# Supplementary material
Source: PubMed Central journal article supplement (PMC2876230)

**Full Title: The Relationship between Smoking and Replicated Sequence Variants on Chromosomes 8 and 9 with Familial Intracranial Aneurysm**

**Cover Title: Role of Smoking and Sequence Variants in Intracranial Aneurysm**

**Table 1: Association of six SNPs on chromosomes 2, 8, and 9 with familial intracranial aneurysm**

**Table 2: Logistic Regression Models for three SNPs and smoking (pack-years) on chromosome 8 and 9 (models adjusted for age)**

**Figure 1 Legend: Plot of all cases who were smokers at any time by pack-years of smoking and age of diagnosis.**

**Figure 2 Legend: All GWAS SNPs 250 kb upstream and downstream of the replicated SNPs are shown in each panel, chromosome 8 in panel A, chromosome 9 in panel B. The dashed horizontal line in each panel indicates the  $\alpha=0.05$  significance threshold correcting for the SNPs in each region by the simpleM method<sup>22</sup>**

**Supplemental Figure Online:** Multidimensional scaling (MDS) plot for the study subjects with reference to Hapmap population controls. First and second principal component scores for each individual are plotted on the x- and y-axis, respectively, based on the genotypes for the markers from the Affymetrix 6.0 array that passed quality control thresholds. Population reference samples are CEU=Caucasians from Utah, YRI=Nigerians from Yoruba, CHB=Han Chinese from Beijing, and JPT=Japanese from Tokyo.

Supplemental Figure:

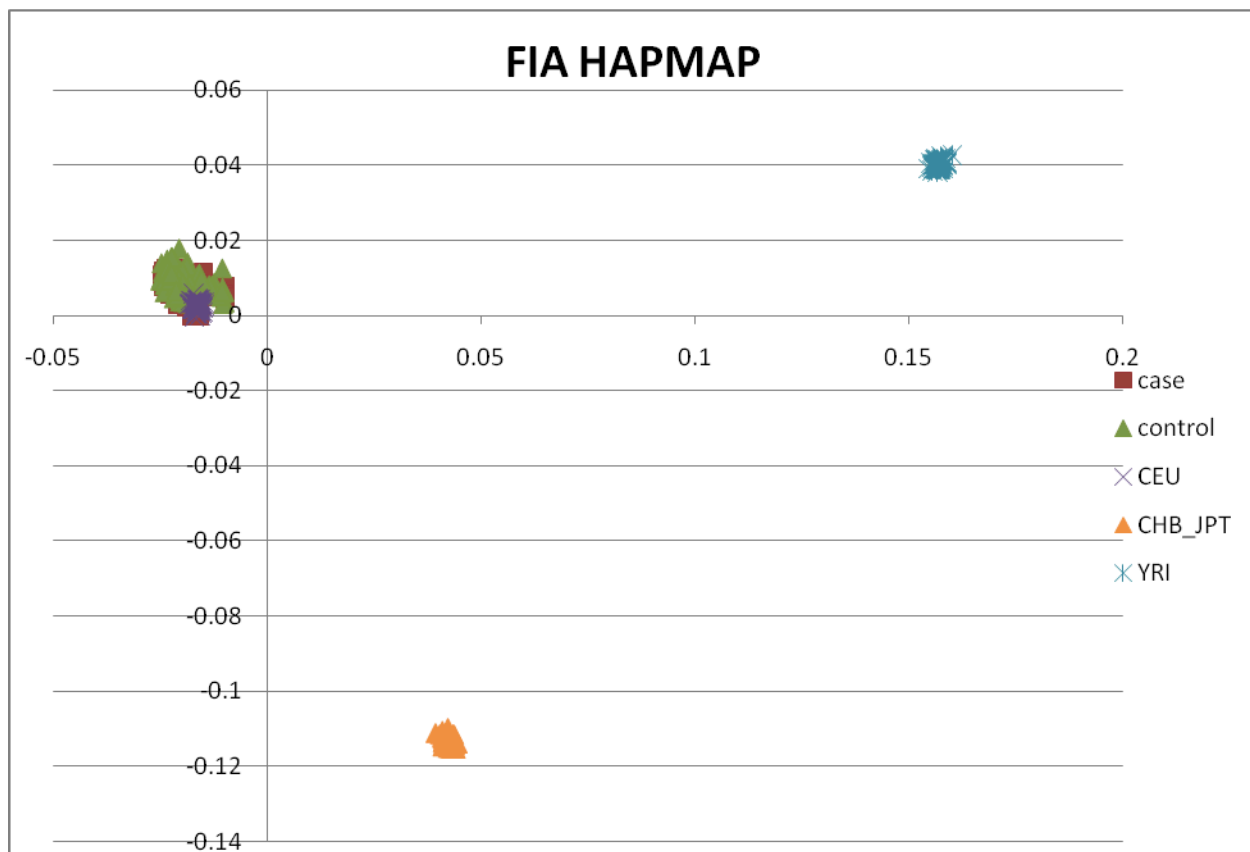

Supplement: NIHMS190511-supplement-1.pdf [file NIHMS190511-supplement-1.pdf]
